# Supplementary material for: Patients in hospital with laboratory-confirmed COVID-19 in a network of Canadian acute care hospitals, Mar. 1 to Aug. 31, 2020: a descriptive analysis
Source: PubMed Central journal article supplement — CMAJ Open. 2021 Mar 2;9(1):E149–56. doi: 10.9778/cmajo.20200246 (PMC8034374; doi:10.9778/cmajo.20200246), 2021-03-02
Supplement: supp_9.1.E149_2020-0246-1-at.pdf [file supp_9.1.E149_2020-0246-1-at.pdf]

**Appendix 1 (as supplied by the authors). List of Canadian Nosocomial Infection Surveillance Program hospitals who participated in COVID-19 surveillance**

Victoria General Hospital, Victoria, BC; Royal Jubilee, Victoria, BC; Nanaimo Regional General Hospital, Nanaimo, BC; BC Women's and Children's Hospital, Vancouver, BC; Peter Lougheed Centre, Calgary, AB; Rockyview General Hospital, Calgary, AB; South Health Campus, Calgary, AB, Foothills Medical Centre, Calgary, A; Alberta Children's Hospital, Calgary, AB; University of Alberta Hospital, Edmonton, AB; Stollery Children's Hospital, Edmonton, AB; Royal University Hospital, Saskatoon, SK; St. Paul's Hospital, Saskatoon, SK; Regina General Hospital, Regina, SK; Pasqua Hospital, Regina, SK; Health Sciences Centre, Winnipeg, MB; University of Manitoba Children's Hospital, Winnipeg, MB; Children's Hospital of Western Ontario, London, ON; Victoria Hospital, London, ON, University Hospital, London, ON; Hamilton Health Science Centre, McMaster Site, Hamilton, ON; St. Joseph's Healthcare, Hamilton, ON; Hamilton Health Sciences Centre, Juravinski Site, Hamilton, ON; Hamilton Health Sciences Centre, General Site, Hamilton, ON; Mount Sinai Hospital, Toronto, ON; Bridgepoint Active Healthcare, Toronto, ON; Sunnybrook Hospital, Toronto, ON; Kingston General Hospital, Kingston, ON; Hospital for Sick Children, Toronto, ON; North York General Hospital, Toronto, ON; Toronto General Hospital, Toronto, ON; Toronto Western Hospital, Toronto, ON; Prince Margaret Hospital, Toronto, ON; Children's Hospital of Eastern Ontario, Ottawa, ON; SMBD - Jewish General Hospital, Montréal, QC; Montréal Children's Hospital, McGill University Health Centre, Montréal, QC; Montréal General Hospital, Montréal, QC; Royal Victoria Hospital, Montréal, QC; Lachine General Hospital, Lachine, QC; Montréal Neurological Institute, Montréal, QC; CHU Sainte-Justine, Montréal, QC; Halifax Infirmary, Halifax, NS; Victoria General, Halifax, NS; Rehabilitation Centre, Halifax, NS; Veterans Memorial Building, Halifax, NS; Dartmouth General Hospital, Halifax, NS; The Moncton Hospital, Moncton, NB; St. Clare's Mercy Hospital, St. John's, NL; General Hospital & Miller Centre, St. John's, NL; Burin Peninsula Health Care Centre, Burin, NL; Carbonear General Hospital, Carbonear, NL; Dr. G.B. Cross Memorial Hospital, Clarenville, NL; Janeway Children's Hospital and Rehabilitation Centre, St. John's, NL; Western Memorial Regional Hospital, Corner Brook, NL; Sir Thomas Roddick Hospital, Stephenville, NL; Queen Elizabeth Hospital, Charlottetown, PEI and Prince County Hospital, Summerside, PEI.
