# Supplementary material for: Patients in hospital with laboratory-confirmed COVID-19 in a network of Canadian acute care hospitals, Mar. 1 to Aug. 31, 2020: a descriptive analysis
Source: PubMed Central journal article supplement — CMAJ Open. 2021 Mar 2;9(1):E149–56. doi: 10.9778/cmajo.20200246 (PMC8034374; doi:10.9778/cmajo.20200246), 2021-03-02
Supplement: supp_9.1.E149_2020-0246-2-at.pdf [file supp_9.1.E149_2020-0246-2-at.pdf]

Appendix 2 (as supplied by the authors). National and regional incidence of patients hospitalized with laboratory-confirmed COVID-19 per 1,000 admissions, by week, March 15 to September 5, 2020

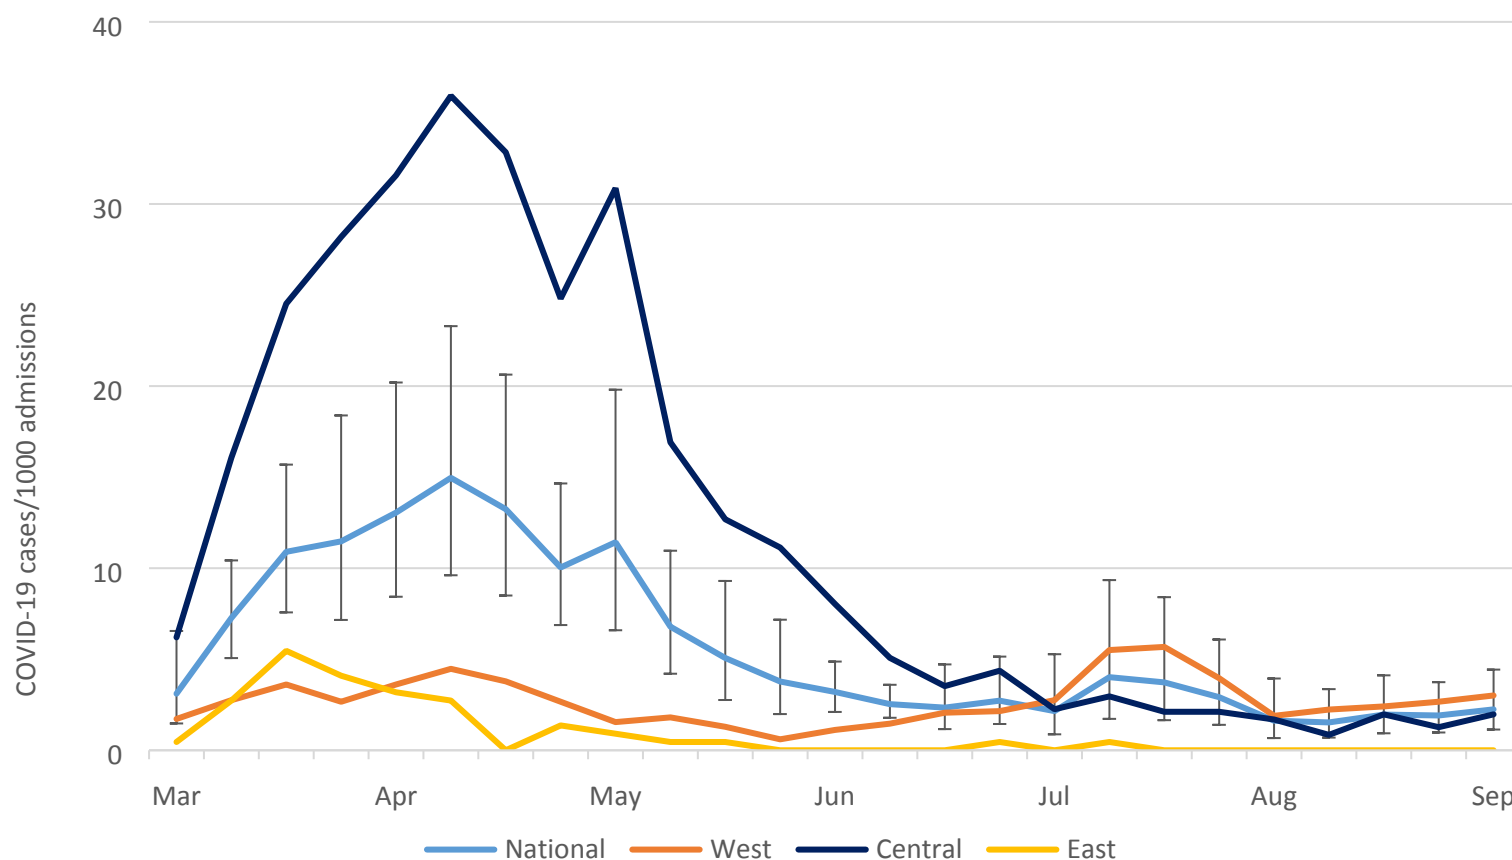

West includes British Columbia, Alberta, Saskatchewan and Manitoba

Central includes Ontario and Quebec

East includes Nova Scotia, New Brunswick, Prince Edward Island, Newfoundland and Labrador

Appendix to: Mitchell R, Choi KB, Pelude L, et al. Patients in hospital with laboratory-confirmed COVID-19 in a network of Canadian acute care hospitals, Mar. 1 to Aug. 31, 2020: a descriptive analysis. *CMAJ Open* 2021. doi: 10.9778/cmajo.20200246. Copyright © 2021 The Author(s) or their employer(s).

To receive this resource in an accessible format, please contact us at [cmajgroup@cmaj.ca](mailto:cmajgroup@cmaj.ca).
