# Supplementary material for: Patients in hospital with laboratory-confirmed COVID-19 in a network of Canadian acute care hospitals, Mar. 1 to Aug. 31, 2020: a descriptive analysis
Source: PubMed Central journal article supplement — CMAJ Open. 2021 Mar 2;9(1):E149–56. doi: 10.9778/cmajo.20200246 (PMC8034374; doi:10.9778/cmajo.20200246), 2021-03-02
Supplement: supp_9.1.E149_2020-0246-original-submission.pdf [file supp_9.1.E149_2020-0246-original-submission.pdf]

**1 Patients Hospitalized with Laboratory-Confirmed COVID-19 in Canadian Acute-Care  
2 Hospitals, March 1 to June 22 2020**

3 Robyn Mitchell<sup>1</sup>, Kelly Baekyung Choi<sup>1</sup>, Linda Pelude<sup>1</sup>, Wallis Rudnick<sup>1</sup>, Nisha Thampi<sup>2,\*</sup> and Geoffrey  
4 Taylor<sup>3,\*</sup> for the CNISP COVID-19 Working Group<sup>a</sup>

5 Affiliations

- 6 1. Public Health Agency of Canada, Ottawa, ON
- 7 2. Children’s Hospital of Eastern Ontario, Ottawa, ON
- 8 3. University of Alberta Hospital, Edmonton, AB

9 \*These authors contributed equally to this report

10 <sup>a</sup>Other members of the CNISP COVID-19 Working Group:

11 James Brooks, Public Health Agency of Canada, Ottawa, ON; Kathryn Bush, Alberta Health Services,  
12 Calgary, BC; Jeannette Comeau, IWK Health Centre, Halifax, NS; John Conly, University of Calgary,  
13 Calgary, AB; Chelsey Ellis, The Moncton Hospital, Moncton, NB; John Embil, Health Sciences Centre,  
14 Winnipeg, MB; Gerald A. Evans, Kingston Health Sciences Centre, Kingston, ON; Charles Frenette, McGill  
15 University Health Centre, Montreal, QC; Gregory German, Queen Elizabeth Hospital, Charlottetown, PEI;  
16 Lynn Johnston, QEII Health Sciences Centre, Halifax, NS; Jennie Johnstone, Sinai Health, Toronto, ON;  
17 Kevin C. Katz, North York General Hospital, Toronto, ON; Bonita E. Lee, Stollery Children’s Hospital,  
18 Edmonton, AB; Marie-Astrid Lefebvre, Montreal Children’s Hospital, Montreal, QC; Yves Longtin, SMBD-  
19 Jewish General Hospital, Montreal, QC; Allison McGeer, Sinai Health, Toronto, ON; Dominik Mertz,  
20 McMaster University and Hamilton Health Sciences, Hamilton, ON; Jessica Minion, Saskatchewan Health  
21 Authority, Regina, SK; Caroline Quach, CHU Sainte-Justine, Montreal, QC; Stephanie Smith, University of  
22 Alberta Hospital, Edmonton, AB; Jocelyn Srigley, BC Women’s and Children’s Hospital, Vancouver, BC;  
23 Paula Stagg, Western Memorial Hospital, Corner Brook, NL; Vivienne Steele, Public Health Agency of  
24 Canada, Ottawa, ON; Kathryn N. Suh, The Ottawa Hospital, Ottawa, ON and Alice Wong, Royal University  
25 Hospital, Saskatoon, SK.

## 26 **Abstract**

27 Understanding the epidemiology of patients hospitalized with laboratory-confirmed COVID-19 in  
28 Canadian acute-care hospitals is essential to inform infection prevention and control strategies and  
29 public health measures. As of June 22, 2020, the Canadian Nosocomial Infection Surveillance Program  
30 received preliminary data for 1,030 patients hospitalized with COVID-19 in 31 sentinel hospitals in 8  
31 provinces. The majority of Canadian patients hospitalized with COVID-19 were older (median age 70  
32 years) and had underlying medical conditions (83.3%). Few pediatric COVID-19 hospitalizations were  
33 reported (n=20, 1.9%). Acquisition of COVID-19 in hospitals was infrequent (3.0% of all cases). Overall,  
34 31.2% of patients acquired their infection in long-term care or retirement homes. Healthcare workers  
35 represented 4.4% of all COVID-19 hospitalized patients. Thirty-day attributable mortality was 15.7%.  
36 Hospitalization rates peaked in mid-April and were highest in Ontario and Quebec. Active surveillance of  
37 patients hospitalized with COVID-19 identifies populations at risk for severe outcomes and helps to  
38 guide Canada's public health response.

## 39 **Introduction**

40 SARS-CoV-2, the novel coronavirus that causes coronavirus disease 2019 (COVID-19), has spread across  
41 the globe and placed a significant burden on healthcare systems. In Canada, the first laboratory-  
42 confirmed case of COVID-19 was hospitalized on January 23, 2020<sup>1,2</sup>; as of July 22, 2020, 104,772 cases  
43 of COVID-19 have been reported<sup>3</sup>. Detailed data on hospitalized patients and those admitted to  
44 intensive care units with COVID-19 are essential to inform infection prevention and control strategies,  
45 prioritize healthcare resources and inform public health measures. Patients hospitalized with COVID-19  
46 have been described in the United States<sup>4-10</sup>, China<sup>11,12</sup> and Italy<sup>13</sup>; however, a detailed understanding of  
47 the patient population hospitalized with COVID-19 in Canada has not yet been reported.

48

## 49 **Methods**

50 The Canadian Nosocomial Infection Surveillance Program (CNISP) conducts surveillance for healthcare-  
51 associated viral respiratory infections. Beginning March 15, 2020, surveillance was expanded to include  
52 all patients hospitalized with laboratory-confirmed COVID-19. The CNISP is a collaboration between the  
53 Public Health Agency of Canada (PHAC) and sentinel hospitals across Canada that participate as  
54 members of the Canadian Hospital Epidemiology Committee, a subcommittee of the Association of  
55 Medical Microbiology and Infectious Disease Canada.<sup>14</sup>

56 Patients of any age who were admitted to a participating CNISP hospital within 14 days of a positive  
57 SARS-CoV-2 test were eligible for inclusion. Healthcare acquisition was defined as symptom onset  $\geq 7$   
58 calendar days after admission to the reporting hospital or if the patient was readmitted with a positive  
59 test  $< 7$  days after discharge from hospital and using best clinical judgement (e.g. symptom onset  $< 7$   
60 days but known epi link to a positive case). Experienced and trained hospital staff reviewed the medical  
61 records of eligible patients using a standardized case report form to collect data on patient  
62 demographics and characteristics, underlying medical conditions, clinical presentation, treatment,  
63 interventions and outcomes. Retrospective case identification of patients admitted back from March 1,  
64 2020, was conducted. In addition, weekly aggregate data on the number of incident COVID-19 cases in  
65 hospital were collected from 44 CNISP and 91 non-CNISP hospitals beginning the week of March 15,  
66 2020. Data were submitted through the Canadian Network for Public Health Intelligence, a secure online  
67 platform. Analyses were conducted using R, version 3.5.1 and SAS EG, version 7.1. Fisher-Freeman-  
68 Halton Exact tests and Chi-square tests were used to compare proportions.

69 This report presents preliminary data on patients hospitalized with laboratory-confirmed COVID-19 in a  
70 subset of Canadian acute care hospitals.

71

## 72 Results

73 As of June 22, 2020, detailed data on patients hospitalized with laboratory-confirmed COVID-19 were  
74 available from 31 CNISP acute-care hospitals in 8 provinces (Table 1). Among 1,030 patients hospitalized  
75 with COVID-19, the median age was 70 years (interquartile range (IQR) = 54–83) and 52.0% (527/1,013)  
76 were male. The proportion of males in the 50–64 year age group was significantly higher compared to  
77 the proportion in other age groups ( $p=0.0008$ ) (Table 2).

78 Twenty (1.9%) pediatric patients (<18 years) were hospitalized with COVID-19; 6 (30.0%) were less than  
79 1 year of age and 6 (30.0%) were 1–4 years of age. Fifty-three percent (8/15) had an underlying medical  
80 condition and two (10.0%) were admitted to an intensive care unit (ICU). No deaths were reported  
81 among pediatric patients.

82 Healthcare workers (HCWs) comprised 4.4% (37/846) of adult (> 18 years) hospitalized cases; 77.8%  
83 (21/27) reported having provided direct care to COVID-19-positive patients. One hospitalized HCW  
84 reported travel outside of Canada in the 14 days prior to symptom onset. The median age of HCWs  
85 hospitalized with COVID-19 was 53 years (IQR = 46-56); 67.6% (25/37) were female and 68.6% (24/35)  
86 had at least one underlying medical condition. Ten (27.8%) were admitted to the ICU due to COVID-19  
87 and one death was reported. HCWs were significantly younger than non-healthcare workers (53 vs. 71  
88 years,  $p<0.001$ ); were more likely to be female (67.6% vs. 48.6%,  $p=0.02$ ) and less likely to have an  
89 underlying medical condition (68.6% vs. 80.1%,  $p=0.003$ ).

90 Among all hospitalized cases, 59.0% (599/1,015) acquired their infection in the community while 3.0% of  
91 cases were due to hospital acquisition (30/1,015) (Table 2). Overall, 31.2% of patients (313/1,002)  
92 acquired their infection in long-term care or retirement homes. The proportion of deaths among  
93 patients admitted from long-term care or retirement homes was 37.4% (117/313), significantly higher  
94 than all other hospitalized patients (12.2%, 84/686,  $p<0.001$ ).

1  
2  
3 95 The majority of patients (83.3%, 722/867) had at least one underlying medical condition and the  
4  
5 96 presence of medical conditions significantly increased with age ( $p<0.001$ ) (Table 2). Chronic heart  
6  
7 97 disease (42.2%), diabetes (25.3%) and chronic lung disease (20.2%) were the most frequently  
8  
9  
10 98 documented conditions among all patients. Among 76 females aged 15–44 years in hospital with COVID-  
11  
12 99 19, 26 (34.2%) were pregnant. Among all patients, pneumonia was the most common clinical  
13  
14 100 presentation (63.8%, 542/849), with the most commonly reported symptoms being cough (64.2%,  
15  
16 101 552/860), fever (62.8%, 540/860), and shortness of breath (57.9%, 498/860). Diarrhea was reported in  
17  
18 102 22.1% of patients (190/860), while 13.6% (117/860) had nausea or vomiting. Significant differences in  
19  
20 103 symptoms were identified between age groups (Table 2). Secondary bacterial infection was identified in  
21  
22 104 18.3% (150/820) of hospitalized patients, and the most common pathogens were *Escherichia coli*  
23  
24 105 (28.7%, 43/150) and coagulase-negative Staphylococci (16.0%, 24/150). Common treatments included  
25  
26 106 ceftriaxone (36.9%, 314/851) and hydroxychloroquine combined with azithromycin (29.7%, 253/851)  
27  
28 107 (Table 3).  
29  
30  
31  
32  
33 108 During hospitalization, 21.0% (214/1,018) of patients with COVID-19 were admitted to the ICU; 14.7%  
34  
35 109 (150/1,021) required mechanical ventilation and two patients (0.2%) required extracorporeal membrane  
36  
37 110 oxygenation. The proportion of patients requiring mechanical ventilation and/or ICU admission was  
38  
39 111 significantly higher among those 50–64 years compared to all other age groups (Table 3). ICU admission  
40  
41 112 was three times higher among patients with an underlying medical condition compared to those  
42  
43 113 without (75.7% vs. 24.3%,  $p<0.001$ ).  
44  
45  
46  
47 114 All cause 30-day mortality was 19.8% (203/1,026) and 30-day attributable mortality was 15.7%  
48  
49 115 (161/1,026). The median age of all patients who died was 83 years (IQR = 75-90) and 57.7% (116/201)  
50  
51 116 were male (Figure 1). Mortality among those admitted to the ICU was 23.0% (49/213) and, of those  
52  
53 117 patients who were mechanically ventilated, 25.3% (38/150) died. The median age of ICU patients who  
54  
55 118 died was 69 years (IQR = 69-79.5) and 75.0% (36/48) were male. Thirty-day all-cause mortality was 19

1  
2  
3 119 times higher among patients with a reported underlying medical condition than those without (95.1%  
4  
5 120 vs. 4.9%,  $p < 0.001$ ).  
6  
7

8 121 The incidence of patients with laboratory-confirmed COVID-19 among 135 Canadian acute care hospitals  
9  
10 122 increased from 3.4 cases per 1,000 admissions during the week of March 15, 2020, peaked at 12.4 per  
11  
12 123 1,000 admissions the week of April 19 and decreased to 1.6 per 1,000 admissions the week of June 21,  
13  
14 124 2020 (Figure 2). Hospitalization rates were highest in the Central region of Canada (Ontario and  
15  
16 125 Quebec), which coincides with the areas of highest prevalence of COVID-19 in Canada.<sup>3</sup>  
17  
18  
19

## 20 126 **Interpretation**

21  
22  
23 127 These data contribute to our understanding of the epidemiology of COVID-19 among adults and children  
24  
25 128 hospitalized in Canadian acute-care hospitals. These findings suggest that a large proportion of  
26  
27 129 Canadians hospitalized with COVID-19 are older and have underlying medical conditions. Few pediatric  
28  
29 130 COVID-19 hospitalizations were reported. These results are consistent with data from the United  
30  
31 131 States<sup>4,6,7,10,15-17</sup> and Europe<sup>18</sup> and with reports of milder COVID-19 illness among pediatric patients.<sup>16,19-  
32  
33 132 21</sup>  
34  
35  
36

37 133 A large proportion of pregnant women were identified among women 15-45 years hospitalized with  
38  
39 134 COVID-19. However, this finding may reflect screening and testing policies for pregnant women upon  
40  
41 135 admission, as 69.2% (18/26) were admitted for labour or pregnancy-related complications rather than  
42  
43 136 COVID-19 related illness. Our surveillance data identified that 4.4% of patients hospitalized with COVID-  
44  
45 137 19 were HCWs, similar to reports from the United States<sup>6,7,22</sup> and China<sup>11</sup> (3.4% to 5% and 3.5%  
46  
47 138 respectively). While many hospitalized HCWs had provided care to COVID-19 patients, it is beyond the  
48  
49 139 scope of our surveillance to ascertain whether acquisition was occupational or in the community.  
50  
51  
52 140 However, recent evidence from Seattle found that there was no significant difference in the prevalence  
53  
54 141 of COVID-19 infection between frontline HCWs and non-frontline staff.<sup>22</sup> In addition, a seroprevalence  
55  
56  
57  
58  
59  
60

1  
2  
3 142 study conducted among hospital staff in Belgium<sup>23</sup> found that neither being directly involved in clinical  
4  
5 143 care nor working in a COVID-19 unit increased the odds of being seropositive, suggesting that  
6  
7 144 transmission in hospitals is likely limited when appropriate infection prevention and control measures  
8  
9  
10 145 are in place. Further plans for enhanced surveillance are underway to better understand the impact of  
11  
12 146 COVID-19 on HCWs.

13  
14  
15 147 Of concern is the large proportion of hospitalized patients (31.2%) who acquired their infection in long-  
16  
17 148 term care or retirement homes. The severe impact of COVID-19 on this vulnerable population has also  
18  
19 149 been reported by the European Union<sup>24</sup> and United States.<sup>5,8,25</sup> Furthermore, mortality among  
20  
21 150 hospitalized patients was highest in patients 85 years and older. These findings highlight the severity of  
22  
23 151 this pandemic among older adults and among those in facilities in Canada.<sup>26</sup> Timely identification of  
24  
25 152 COVID-19 in the community is important for rapid implementation of control measures to protect these  
26  
27 153 populations.

28  
29  
30  
31 154 COVID-19 hospitalization rates indicate that, with a few exceptions, public health measures were able to  
32  
33 155 mitigate a surge in patients during the first pandemic wave. Ongoing monitoring of hospital and ICU  
34  
35 156 admissions is a key indicator that will provide timely information on COVID-19 disease activity and  
36  
37 157 severity in Canada to inform public health decision making and optimize mitigation strategies, including  
38  
39 158 the extent to which non-urgent care should be scaled down in preparation for future waves.

40  
41  
42  
43 159 Our data have several limitations. This report describes preliminary findings of the epidemiology of the  
44  
45 160 first wave of COVID-19 in a subset of Canadian acute-care hospitals. These findings may change as  
46  
47 161 additional data become available. CNISP hospitals are predominantly large teaching hospitals, therefore  
48  
49 162 results may not be generalizable to all Canadian acute-care facilities. It is important to note that the data  
50  
51 163 represent those cases that were severe enough to require hospitalization and are not fully descriptive of  
52  
53 164 all persons identified with COVID-19.

1  
2  
3 165 **Conclusion**  
4  
5

6 166 This report describes the current epidemiology of patients hospitalized with COVID-19, using preliminary  
7  
8 167 data from a subset of Canadian acute-care hospitals. Our findings have identified populations at risk for  
9  
10 168 severe outcome (such as long-term care home residents) for whom coordinated and targeted control  
11  
12 169 measures are required. Continued surveillance of hospitalization rates, clinical characteristics and  
13  
14 170 outcomes of patients hospitalized with COVID-19 is critical to enhancing our knowledge of the  
15  
16 171 epidemiology of COVID-19 in Canada and guiding our response to future waves of infection.  
17  
18  
19

20 172  
21  
22  
23  
24  
25  
26  
27  
28  
29  
30  
31  
32  
33  
34  
35  
36  
37  
38  
39  
40  
41  
42  
43  
44  
45  
46  
47  
48  
49  
50  
51  
52  
53  
54  
55  
56  
57  
58  
59  
60

Confidential



1  
2  
3 173 **Acknowledgements**  
4

5 174 The authors thank Joelle Cayen and Cecilia McClellan for their support with data entry and gratefully  
6 175 acknowledge the dedication and contributions of the infection control practitioners, epidemiologists  
7 176 and staff for their data collection and submission at each participating hospital, as well as the following  
8 177 members of the Canadian Nosocomial Infection Surveillance Program:

9  
10  
11 178 Bonita E. Lee, Stollery Children's Hospital, Edmonton, AB; Caroline Quach, CHU Sainte-Justine, Montreal,  
12 179 QC; Chelsey Ellis, The Moncton Hospital, Moncton, NB; Dominik Mertz, McMaster University and  
13 180 Hamilton Health Sciences, Hamilton, ON; Geoffrey Taylor, University of Alberta Hospital, Edmonton, AB;  
14 181 Gerald A. Evans, Kingston Health Sciences Centre, Kingston, ON; Gregory German, Queen Elizabeth  
15 182 Hospital, Charlottetown, PEI; Ian Davis, QEII Health Sciences Centre, Halifax, NS; Jeannette Comeau, IWK  
16 183 Health Centre, Halifax, NS; Jennie Johnstone, Sinai Health, Toronto, ON; Jerome Leis, Sunnybrook Health  
17 184 Sciences Centre, Toronto, ON; Jessica Minion, Saskatchewan Health Authority, Regina, SK; Joanne  
18 185 Embree, Health Sciences Centre, Winnipeg, MB; Jocelyn Srigley, BC Children's Hospital, BC Women's  
19 186 Hospital, Vancouver, BC; Johan Delpont, London Health Sciences Centre, London, ON; John Embil,  
20 187 Health Sciences Centre, Winnipeg, MB; Joseph Vayalumkal, Alberta Children's Hospital, Calgary, AB;  
21 188 Kathryn Bush, Alberta Health Services, Calgary, AB; Kevin C. Katz, North York General Hospital, Toronto,  
22 189 ON; Lynn Johnston, QEII Health Sciences Centre, Halifax, NS; Marie-Astrid Lefebvre, Montreal Children's  
23 190 Hospital, Montreal, QC; Michelle Science, Hospital for Sick Children, Toronto, ON; Natalie Bridger,  
24 191 Eastern Health-HSC, St. John's, NL; Nisha Thampi, Children's Hospital of Eastern Ontario, Ottawa, ON;  
25 192 Pamela Kibsey, Royal Jubilee Hospital, Victoria, BC; Paula Stagg, Western Memorial Hospital, Corner  
26 193 Brook, NL; Stephanie Smith, University of Alberta Hospital, Edmonton, AB; Susy Hota, University Health  
27 194 Network, Toronto, ON and Yves Longtin, SMBD-Jewish General Hospital, Montreal, QC.

28  
29  
30  
31  
32 195

33  
34 196

35  
36  
37 197  
38  
39  
40  
41  
42  
43  
44  
45  
46  
47  
48  
49  
50  
51  
52  
53  
54  
55  
56  
57  
58  
59  
60

## 198 References

- 199 1. Silverstein WK, Stroud L, Cleghorn GE, Leis JA. First imported case of 2019 novel coronavirus in  
200 Canada, presenting as mild pneumonia. *Lancet*. 2020;395(734):19-21.
- 201 2. Marchand-Senécal X, Kozak R, Mubareka S, et al. Diagnosis and Management of First Case of  
202 COVID-19 in Canada: Lessons applied from SARS. *Clin Infect Dis*. Published online 2020.  
203 doi:10.1093/cid/ciaa227
- 204 3. Public Health Agency of Canada. Coronavirus disease (COVID-19): Outbreak update. Accessed July  
205 2, 2020. [https://www.canada.ca/en/public-health/services/diseases/2019-novel-coronavirus-](https://www.canada.ca/en/public-health/services/diseases/2019-novel-coronavirus-infection.html?topic=tilelink)  
206 [infection.html?topic=tilelink](https://www.canada.ca/en/public-health/services/diseases/2019-novel-coronavirus-infection.html?topic=tilelink)
- 207 4. Garg S, Kim L, Whitaker M, et al. Hospitalization Rates and Characteristics of Patients Hospitalized  
208 with Laboratory-Confirmed Coronavirus Disease 2019 - COVID-Net, 14 States, march 1-30, 2020.  
209 *Morb Mortal Wkly Rep*. 2020;69(15):458-464.
- 210 5. Gold JAW, Wong KK, Szablewski CM, et al. Characteristics and Clinical Outcomes of Adult Patients  
211 Hospitalized with COVID-19 - Georgia, March 2020. *MMWR Morb Mortal Wkly Rep*.  
212 2020;69(18):545-550. doi:10.15585/mmwr.mm6918e1
- 213 6. Killerby ME, Link-Gelles R, Haight SC, Schrodt CA, England L. Characteristics Associated with  
214 Hospitalization Among Patients with COVID-19 - Metropolitan Atlanta, Georgia, March-April  
215 2020. *MMWR Morb Mortal Wkly Rep*. 2020;69(April).
- 216 7. Cummings MJ, Baldwin MR, Abrams D, et al. Epidemiology, clinical course, and outcomes of  
217 critically ill adults with COVID-19 in New York City: a prospective cohort study. *Lancet*.  
218 2020;395(10239):1763-1770. doi:10.1016/S0140-6736(20)31189-2
- 219 8. Bhatraju PK, Ghassemieh BJ, Nichols M, et al. COVID-19 in Critically Ill Patients in the Seattle

- 1  
2  
3 220 region — Case series. *N Engl J Med.* 2020;382(21):2012-2022. doi:10.1056/NEJMoa2004500  
4  
5  
6 221 9. Petrilli CM, Jones SA, Yang J, et al. Factors associated with hospital admission and critical illness  
7  
8 222 among 5279 people with coronavirus disease 2019 in New York City: Prospective cohort study.  
9  
10 223 *BMJ.* 2020;369. doi:10.1136/bmj.m1966  
11  
12  
13 224 10. Richardson S, Hirsch JS, Narasimhan M, et al. Presenting Characteristics, Comorbidities, and  
14  
15 225 Outcomes among 5700 Patients Hospitalized with COVID-19 in the New York City Area. *JAMA.*  
16  
17 226 2020;323(20):2052-2059. doi:10.1001/jama.2020.6775  
18  
19  
20  
21 227 11. Guan W, Ni Z, Hu Y, et al. Clinical characteristics of coronavirus disease 2019 in China. *N Engl J*  
22  
23 228 *Med.* 2020;382(18):1708-1720. doi:10.1056/NEJMoa2002032  
24  
25  
26 229 12. Zhou F, Yu T, Du R, et al. Clinical course and risk factors for mortality of adult inpatients with  
27  
28 230 COVID-19 in Wuhan, China: a retrospective cohort study. *Lancet.* 2020;395(10229):1054-1062.  
29  
30 231 doi:10.1016/S0140-6736(20)30566-3  
31  
32  
33 232 13. Grasselli G, Zangrillo A, Zanella A, et al. Baseline Characteristics and Outcomes of 1591 Patients  
34  
35 233 Infected with SARS-CoV-2 Admitted to ICUs of the Lombardy Region, Italy. *JAMA.*  
36  
37 234 2020;323(16):1574-1581. doi:10.1001/jama.2020.5394  
38  
39  
40  
41 235 14. Canadian Nosocomial Infection Surveillance Program. Healthcare-associated infections and  
42  
43 236 antimicrobial resistance in Canadian acute care hospitals, 2014–2018. *Canada Commun Dis Rep.*  
44  
45 237 2020;46(5):99-112. doi:10.14745/ccdr.v46i05a01  
46  
47  
48 238 15. Stokes EK, Zambrano LD, Anderson KN, Marder EP, Raz KM. Coronavirus Disease 2019 Case  
49  
50 239 Surveillance — United States, January 22–May 30, 2020. *MMWR Morb Mortal Wkly Rep.* 2020;69.  
51  
52  
53 240 16. Bialek S, Boundy E, Bowen V, et al. Severe Outcomes Among Patients with Coronavirus Disease  
54  
55 241 2019 (COVID-19) - United States, February 12–March 16, 2020. *MMWR Morb Mortal Wkly Rep.*  
56  
57  
58  
59  
60

- 1  
2  
3 242 2020;69(12):343-346. doi:10.15585/mmwr.mm6912e2  
4  
5  
6 243 17. Chow N, Fleming-Dutra K, Gierke R, et al. Preliminary Estimates of the Prevalence of Selected  
7  
8 244 Underlying Health Conditions Among Patients with Coronavirus Disease 2019 - United States,  
9  
10 245 February 12-March 28, 2020. *MMWR Morb Mortal Wkly Rep.* 2020;69(13):382-386.  
11  
12 246 doi:10.15585/MMWR.MM6913E2  
13  
14  
15 247 18. Coronavirus disease 2019 (COVID-19) in the EU/EEA and the UK– ninth update. *ECDC.* 2020;(23  
16  
17 248 April 2020).  
18  
19  
20  
21 249 19. Bialek S, Gierke R, Hughes M, McNamara LA, Pilishvili T, Skoff T. Coronavirus Disease 2019 in  
22  
23 250 Children — United States, February 12–April 2, 2020. *MMWR Morb Mortal Wkly Rep.*  
24  
25 251 2020;69(14):422-426. doi:10.15585/MMWR.MM6914E4  
26  
27  
28 252 20. Shekerdemian LS, Mahmood NR, Wolfe KK, et al. Characteristics and Outcomes of Children with  
29  
30 253 Coronavirus Disease 2019 (COVID-19) Infection Admitted to US and Canadian Pediatric Intensive  
31  
32 254 Care Units. *JAMA Pediatr.* 2020;2019:1-6. doi:10.1001/jamapediatrics.2020.1948  
33  
34  
35 255 21. Dong Y, Mo X, Hu Y, et al. Epidemiology of COVID-19 Among Children in China. *Pediatrics.*  
36  
37 256 2020;145(6). doi:10.1542/peds.2020-0702  
38  
39  
40  
41 257 22. Mani NS, Budak JZ, Lan KF, Bryson-Chan C. Prevalence of COVID-19 Infection and Outcome  
42  
43 258 Among Symptomatic Healthcare Workers in Seattle, Washington. *Clin Infect Dis.* 2020;40:1-30.  
44  
45 259 doi:10.1093/ofid/ofy003/4791932  
46  
47  
48 260 23. Steensels D, Oris E, Coninx L, et al. Hospital-Wide SARS-CoV-2 Antibody Screening in 3056 Staff in  
49  
50 261 a Tertiary Center in Belgium. *JAMA.* 2020;2:15-17. doi:10.1001/jama.2020.11160  
51  
52  
53 262 24. ECDC Public Health Emergency Team, Danis K, Fonteneaus L, et al. High impact of COVID-19 in  
54  
55 263 long-term care facilities, suggestion for monitoring in the EU/EEA, May 2020. *Eurosurveillance.*

1  
2  
3  
4  
5  
6  
7  
8  
9  
10  
11  
12  
13  
14  
15  
16  
17  
18  
19  
20  
21  
22  
23  
24  
25  
26  
27  
28  
29  
30  
31  
32  
33  
34  
35  
36  
37  
38  
39  
40  
41  
42  
43  
44  
45  
46  
47  
48  
49  
50  
51  
52  
53  
54  
55  
56  
57  
58  
59  
60

264 2020;25(22):1-5. doi:10.2807/1560-7917.ES.2020.25.22.2000956

265 25. McMichael TM, Currie DW, Clark S, et al. Epidemiology of Covid-19 in a Long-Term Care Facility in  
266 King County, Washington. *N Engl J Med.* 2020;382(21):2008-2011. doi:10.1056/NEJMoa2005412

267 26. Fisman DN, Bogoch I, Lapointe-shaw L, McCreedy J, Tuite AR. Risk Factors Associated With  
268 Mortality Among Residents With Coronavirus Disease 2019 (COVID-19 ) in Long-term Care  
269 Facilities in Ontario , Canada. *JAMA Netw Open.* 2020;3(7):1-7.  
270 doi:10.1001/jamanetworkopen.2020.15957

271

Confidential

Table 1. Summary of participating hospitals who provided detailed patient information (N=31), March 1 – June 22, 2020

| Province            | Number of hospitals | Number and proportion of cases |      |
|---------------------|---------------------|--------------------------------|------|
|                     | n                   | n                              | %    |
| British Columbia    | 3                   | 20                             | 1.9  |
| Alberta             | 6                   | 231                            | 22.4 |
| Saskatchewan        | 2                   | 5                              | 0.5  |
| Manitoba            | 2                   | 9                              | 0.9  |
| Ontario             | 13                  | 273                            | 26.5 |
| Quebec              | 2                   | 446                            | 43.3 |
| Atlantic provinces* | 3                   | 46                             | 4.5  |

\*Atlantic provinces includes: Nova Scotia and Newfoundland and Labrador

Confidential

Table 2. Demographics and clinical characteristics of patients hospitalized with laboratory-confirmed COVID-19 (N=1,030), March 1 – June 22, 2020

|                                            | Age group (years), no./total no. (%) |              |               |               |                |          |
|--------------------------------------------|--------------------------------------|--------------|---------------|---------------|----------------|----------|
|                                            | All ages                             | <18          | 18–49         | 50–64         | 65+            | <i>p</i> |
| No. patients                               | 1,030                                | 20 (1.9)     | 171 (16.6)    | 239 (23.3)    | 598 (58.2)     | N/A      |
| Age - median (IQR)*                        | 70 (54-83)                           | 1 (0–11)     | 39 (33–45)    | 57 (54–61)    | 81 (73–88)     |          |
| Sex (Male)                                 | 527/1,013 (52.0)                     | 7/20 (35.0)  | 80 (47.1)     | 147 (62.8)    | 293 (49.9)     | 0.0008   |
| Sex (Female)                               | 486/1,013 (48.0)                     | 13/20 (64.0) | 90 (52.9)     | 87 (37.2)     | 294 (50.1)     | 0.0011   |
|                                            |                                      |              |               |               |                |          |
| Healthcare worker                          | 37/846 (4.4)                         | N/A          | 13/122 (10.7) | 23/184 (12.5) | 1/540 (0.2)    | <0.0001  |
| Long term care or retirement home resident | 313/1,002 (31.2)                     | N/A          | 1/169 (0.6)   | 19/238 (8.0)  | 291/591 (49.3) | <0.0001  |
|                                            |                                      |              |               |               |                |          |
| <b>Underlying medical conditions</b>       | n=867                                | n=15         | n=123         | n=184         | n=539          |          |
| Any condition                              | 722 (83.3)                           | 8 (53.3)     | 79 (64.2)     | 78 (63.4)     | 503 (93.3)     | <0.0001  |
| Heart disease                              | 366 (42.2)                           | 2 (13.3)     | 13 (10.6)     | 55 (29.9)     | 295 (54.7)     | <0.0001  |
| Diabetes                                   | 219 (25.3)                           | 0            | 15 (12.2)     | 38 (20.7)     | 166 (30.8)     | <0.0001  |
| Lung                                       | 175 (20.2)                           | 2 (13.3)     | 14 (11.4)     | 30 (16.3)     | 128 (23.8)     | 0.0053   |
| Kidney                                     | 71 (8.1)                             | 1 (6.7)      | 3 (2.4)       | 10 (5.4)      | 57 (10.6)      | 0.0059   |
| Immunosuppression                          | 38 (4.4)                             | 0            | 4 (3.3)       | 12 (6.5)      | 22 (4.1)       | 0.4563   |
| Cancer                                     | 49 (5.7)                             | 1 (6.7)      | 4 (3.3)       | 10 (5.4)      | 34 (6.3)       | 0.5632   |
| Neurological disorder                      | 44 (5.1)                             | 0            | 2 (1.6)       | 7 (3.8)       | 35 (6.5)       | 0.1013   |
| Liver disease                              | 19 (2.2)                             | 0            | 2 (1.6)       | 6 (3.3)       | 11 (2.0)       | 0.7065   |
| Pregnant**                                 | 26/76 (34.2)                         | N/A          | N/A           | N/A           | N/A            | N/A      |
|                                            |                                      |              |               |               |                |          |
| <b>Symptoms</b>                            |                                      | n=15         | n=129         | n=186         | n=528          |          |
| Cough                                      | 552/860 (64.2)                       | 6 (40.0)     | 87 (67.4)     | 142 (76.3)    | 315 (59.7)     | <0.0001  |
| Fever                                      | 540/860 (62.8)                       | 7 (46.7)     | 83 (64.3)     | 136 (73.1)    | 312 (59.1)     | 0.0031   |
| Shortness of breath                        | 498/860 (57.9)                       | 3 (20.0)     | 79 (61.2)     | 131 (70.4)    | 284 (53.8)     | <0.0001  |
| Weakness                                   | 186/860 (21.6)                       | 2 (13.3)     | 19 (14.7)     | 47 (25.3)     | 118 (22.4)     | 0.1200   |
| Diarrhea                                   | 190/860 (22.1)                       | 2 (13.3)     | 33 (25.6)     | 62 (33.3)     | 93 (17.6)      | 0.0001   |
| Pain                                       | 169/860 (19.6)                       | 0            | 40 (31.0)     | 60 (32.3)     | 67 (12.7)      | <0.0001  |

|                               |                |           |            |            |            |         |
|-------------------------------|----------------|-----------|------------|------------|------------|---------|
| Vomiting or nausea            | 117/860 (13.6) | 2 (13.3)  | 21 (16.3)  | 33 (17.7)  | 61 (11.6)  | 0.1217  |
| Sore throat                   | 86/860 (10.0)  | 2 (13.3)  | 25 (19.4)  | 25 (13.4)  | 33 (6.3)   | <0.0001 |
| Headache                      | 82/860 (9.5)   | 1 (6.7)   | 20 (15.5)  | 35 (18.8)  | 25 (4.7)   | <0.0001 |
| Runny nose                    | 52/860 (6.0)   | 2 (13.3)  | 14 (10.9)  | 12 (6.5)   | 23 (4.4)   | 0.0193  |
| Loss of smell or taste        | 27/860 (3.1)   | 1 (6.7)   | 10 (7.8)   | 10 (5.4)   | 6 (1.1)    | 0.0001  |
|                               |                |           |            |            |            |         |
| <b>Acquisition</b>            | n=1,015        | n=20      | n=167      | n=238      | n=588      | <0.0001 |
| Community                     | 599 (59.0)     | 17 (85.0) | 149 (89.2) | 196 (82.4) | 236 (40.1) | N/A     |
| Reporting healthcare facility | 30 (3.0)       | 0         | 3 (1.8)    | 3 (1.3)    | 24 (4.1)   | N/A     |
| Other healthcare facility     | 326(32.1)      | 1 (5.0)   | 1 (0.6)    | 24 (10.1)  | 229 (50.9) | N/A     |
| Unknown                       | 60 (5.9)       | 2 (10.0)  | 14 (8.4)   | 15 (6.3)   | 29 (4.9)   | N/A     |
|                               |                |           |            |            |            |         |
|                               |                | n=15      | n=115      | n=179      | n=509      |         |
| Secondary bacterial infection | 150/820 (18.3) | 0         | 12 (10.4)  | 30 (16.8)  | 108 (21.2) | 0.0078  |

\*IQR, interquartile range; \*\*Among females age 15-44 years; N/A, not applicable



Table 3. Treatment, interventions and outcomes of patients hospitalized with laboratory-confirmed COVID-19 (N=1,030), March 1 – June 22, 2020

|                                        | All ages              | Age group (years), no./total no. (%) |                   |                    |                     | p              |
|----------------------------------------|-----------------------|--------------------------------------|-------------------|--------------------|---------------------|----------------|
|                                        |                       | <18                                  | 18–49             | 50–64              | 65+                 |                |
| <b>Antimicrobials</b>                  |                       |                                      |                   |                    |                     |                |
| Ceftriaxone                            | 314/851 (36.9)        | 0                                    | 37/124 (29.8)     | 78/183 (42.6)      | 197/527 (37.4)      | 0.0010         |
| Azithromycin                           | 199/851 (23.4)        | 0                                    | 29/124 (23.4)     | 32/183 (23.5)      | 126/527 (23.9)      | 0.1511         |
| Piperacillin/Tazobactam                | 99/851 (11.6)         | 0                                    | 5/124 (4.0)       | 17/183 (9.3)       | 76/527 (14.4)       | 0.0020         |
| <b>Treatment</b>                       |                       |                                      |                   |                    |                     |                |
| Hydroxychloroquine + azithromycin      | 253/851 (29.7)        | 1/15 (6.7)                           | 31/124 (25.0)     | 68/183 (37.2)      | 152/527 (28.8)      | 0.0163         |
| Steroids                               | 79/851 (9.3)          | 0                                    | 5/124 (4.0)       | 13/183 (7.1)       | 60/527 (11.4)       | 0.0262         |
| Oseltamivir                            | 60/754 (8.0)          | 0                                    | 9/104 (8.7)       | 16/158 (10.1)      | 35/476 (7.4)        | 0.5394         |
| <b>ICU admission and interventions</b> |                       |                                      |                   |                    |                     |                |
| ICU admission due to COVID-19          | 214/1,014 (21.1)      | 2/20 (10.0)                          | 33/169 (19.5)     | 75/235 (31.9)      | 104/588 (17.7)      | <0.0001        |
| Invasive mechanical ventilation        | 150/1,021 (14.7)      | 0                                    | 18/171 (10.5)     | 62/237 (26.2)      | 70/591 (11.8)       | <0.0001        |
| Extracorporeal membrane oxygenation    | 2/1,014 (0.2)         | NR*                                  | NR                | NR                 | NR                  | NR             |
| Dialysis as a result of COVID-19       | 26/836 (3.1)          | 0                                    | 2/116 (1.7)       | 10/179 (5.6)       | 14/525 (2.7)        | 0.2273         |
| <b>30 day outcome</b>                  |                       |                                      |                   |                    |                     |                |
| Still in hospital                      | n=1,026<br>166 (16.2) | n=20<br>1 (5.0)                      | n=170<br>10 (5.9) | n=239<br>31 (13.0) | n=595<br>124 (20.8) | <0.0001<br>N/A |
| Discharged                             | 602 (58.7)            | 17 (85.0)                            | 155 (91.2)        | 185 (77.4)         | 244 (41.0)          | N/A            |
| Transferred                            | 55 (5.4)              | 2 (10.0)                             | 4 (2.4)           | 8 (3.4)            | 41 (6.9)            | N/A            |
| Died                                   | 203 (19.8)            | 0                                    | 1 (0.6)           | 15 (6.3)           | 186 (31.3)          | N/A            |
| Death attributable to COVID-19         | 161/197 (81.7)        | 0                                    | 1/1 (100)         | 13/14 (92.9)       | 141/181 (80.7)      | 0.5701         |

\*NR = data not reported due to small numbers

Figure 1. 30-day outcome among patients hospitalized with laboratory-confirmed COVID-19, by age group (N=1,025), March 1 – June 22, 2020

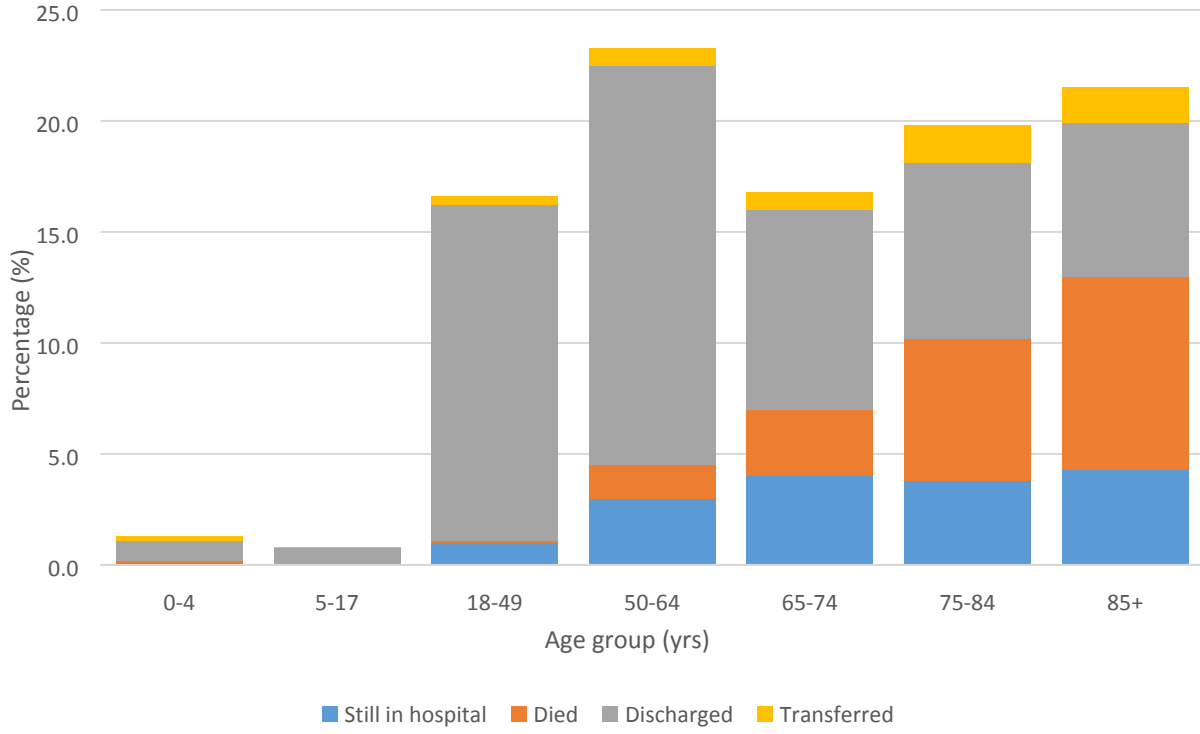

1  
2  
3  
4  
5  
6  
7  
8  
9  
10  
11  
12  
13  
14  
15  
16  
17  
18  
19  
20  
21  
22  
23  
24  
25  
26  
27  
28  
29  
30  
31  
32  
33  
34  
35  
36  
37  
38  
39  
40  
41  
42  
43  
44  
45  
46  
47  
48  
49  
50  
51  
52  
53  
54  
55  
56  
57  
58  
59  
60

Figure 2. National and regional incidence of patients hospitalized with laboratory-confirmed COVID-19 per 1,000 admissions, by week, March 15 – June 27, 2020

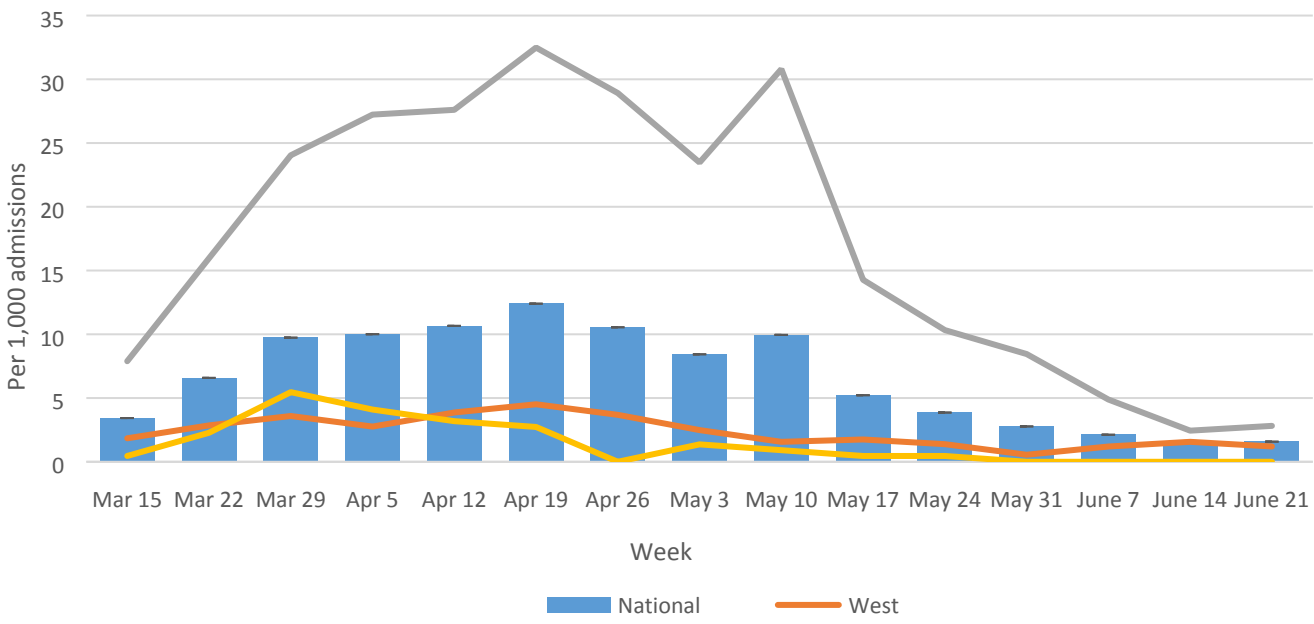

West includes British Columbia, Alberta, Saskatchewan and Manitoba (107 reporting hospitals)

Central includes Ontario and Quebec (11 reporting hospitals)

East includes Nova Scotia, New Brunswick, Prince Edward Island, Newfoundland and Labrador (17 reporting hospitals)
